# Supplementary material for: Ultrahigh thermal stability and piezoelectricity of lead-free piezoceramics through mimicking PZT’s MPB structure
Source: Research Square preprint supplement (doi:10.21203/rs.3.rs-4133025/v1), 2024-07-04
Supplement: Supplementary file 1 [file 99b56607a660685f425efffa.docx]

**Supporting Information**

**Ultrahigh thermal stability and piezoelectricity of lead-free piezoceramics through mimicking PZT’s MPB structure**

*Lihui, Xu1,#, Jinfeng Lin1,#, Yuxuan Yang2,#, Zhihao Zhao2, Xiaoming Shi3, Guanglong Ge1, Jin Qian1, Cheng Shi1, Guohui Li1, Simin Wang1, Yang Zhang2, Bo Shen1,*
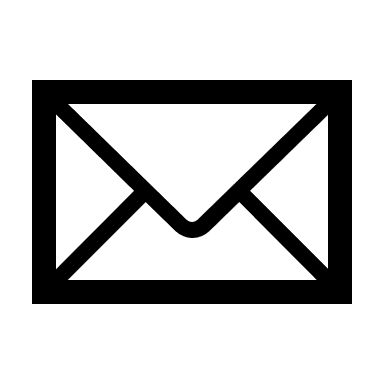
*, Zhengqian Fu4,* *Houbing Huang5,*
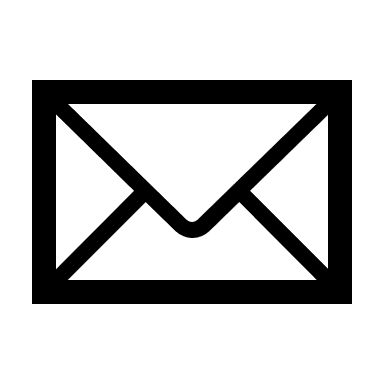
*, Haijun Wu2,*
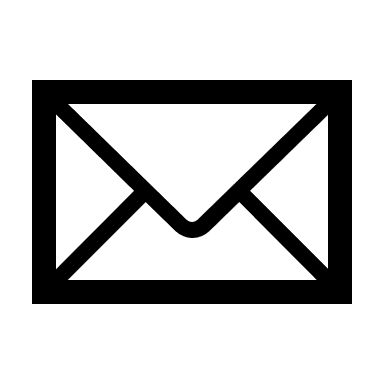
*, Jiwei Zhai1,*
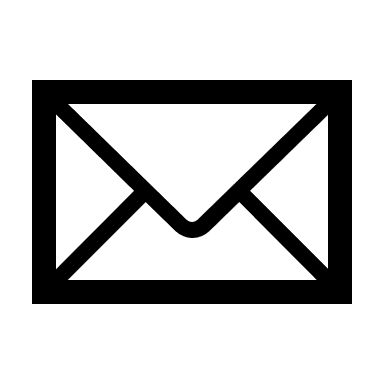


1School of Materials Science and Engineering, Tongji University, Shanghai 201804, China. 2State Key Laboratory for Mechanical Behavior of Materials, Xi'an Jiaotong University, Xi'an 710049, P. R. China. 3Department of Physics, University of Science and Technology Beijing, Beijing 100083, China. 4Chinese Acad Sci, Shanghai Inst Ceram, State Key Lab High Performance Ceram & Superfine, Shanghai 200050, China. 5School of Materials Science and Engineering, Beijing Institute of Technology, Beijing 100081, China. *#*These authors contributed equally.
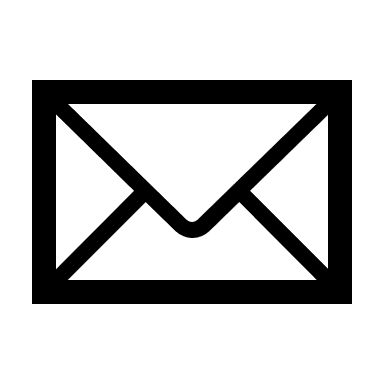
E-mail: [shenbo@tongji.edu.cn](mailto:shenbo@tongji.edu.cn" \t "_blank) (B. Shen); hbhuang@bit.edu.cn (H. Huan); [wuhaijunnavy@xjtu.edu.cn](mailto:wuhaijunnavy@xjtu.edu.cn) (H. Wu); [apzhai@tongji.edu.cn](mailto:apzhai@tongji.edu.cn) (J. Zhai);


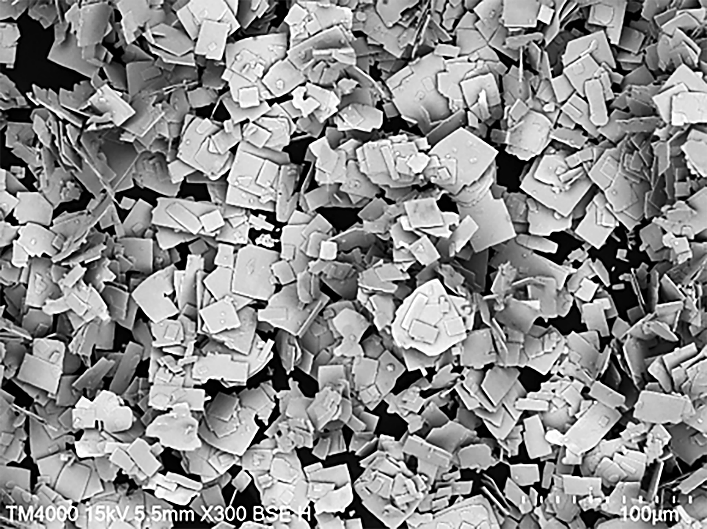


****Figure S1.** The SEM of the NN platelet template.**


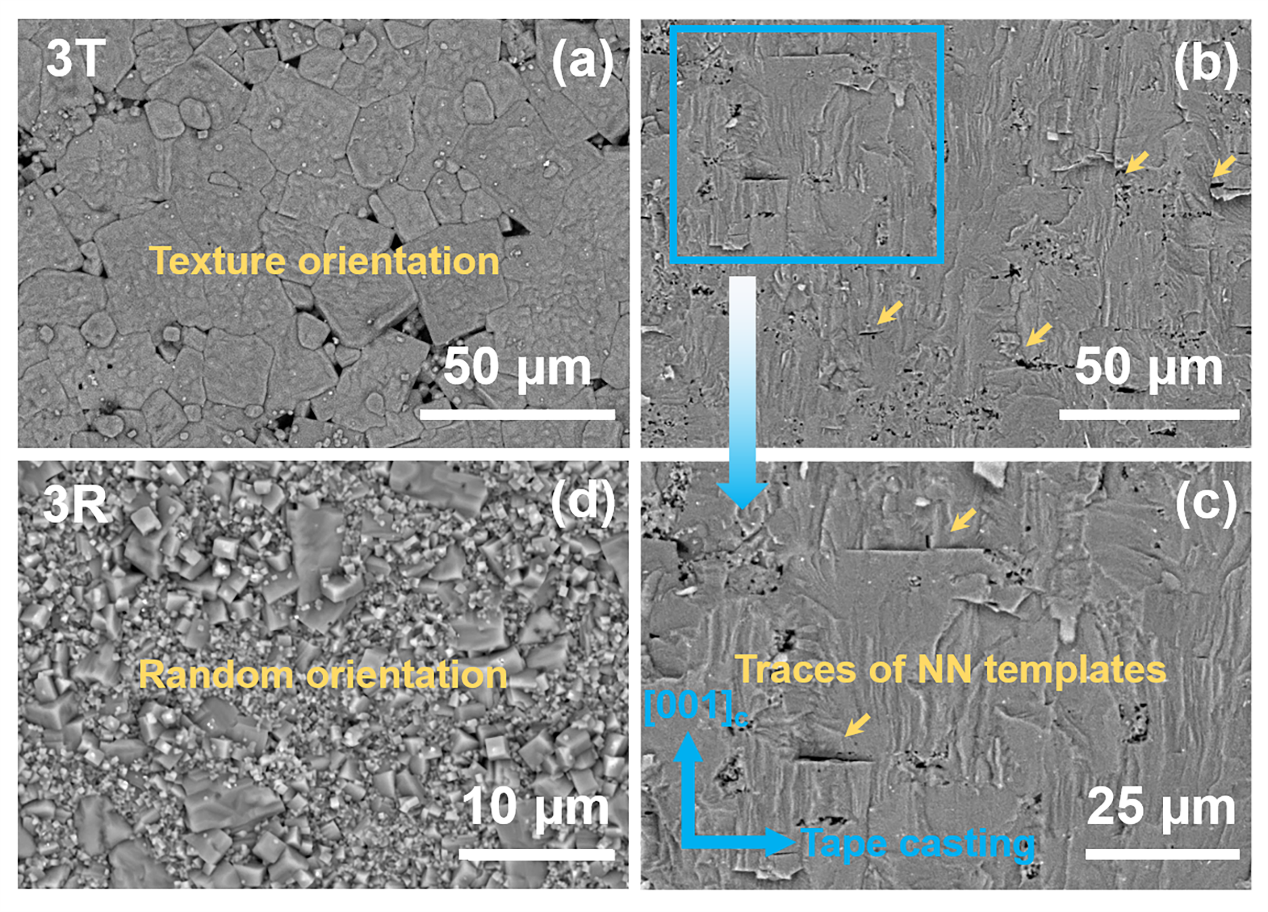


****Figure S2.** a) The surface SEM images of the 3T ceramics. b, c) Cross section SEM images of the 3T ceramics. d) The surface SEM images of the 3R ceramics.**


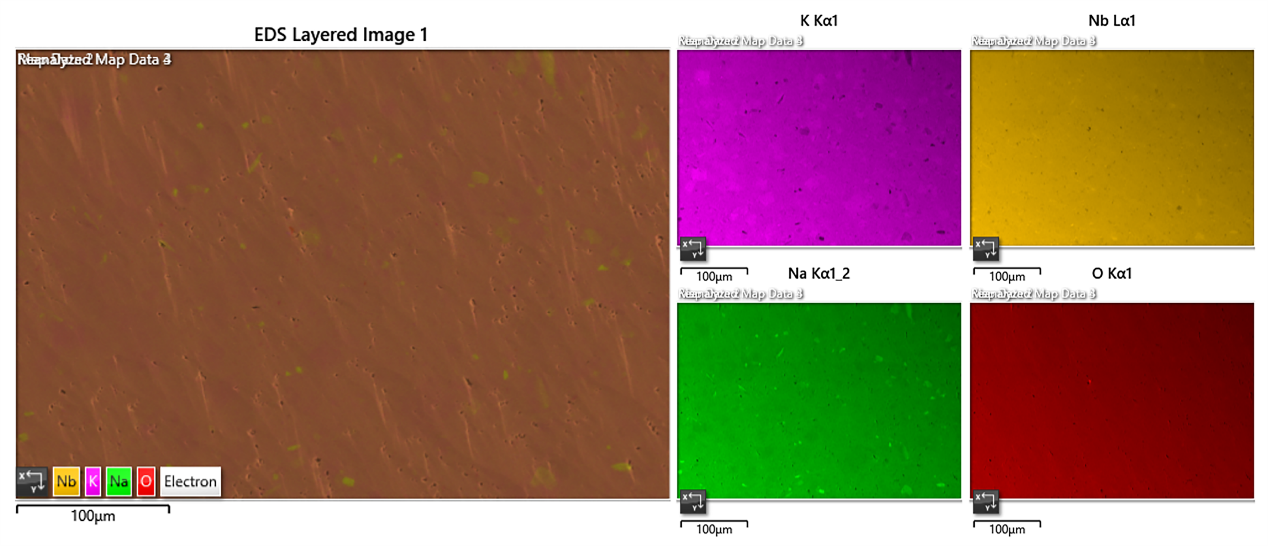


****Figure S3.** EDS diagram of the main elements in 3T ceramics.**


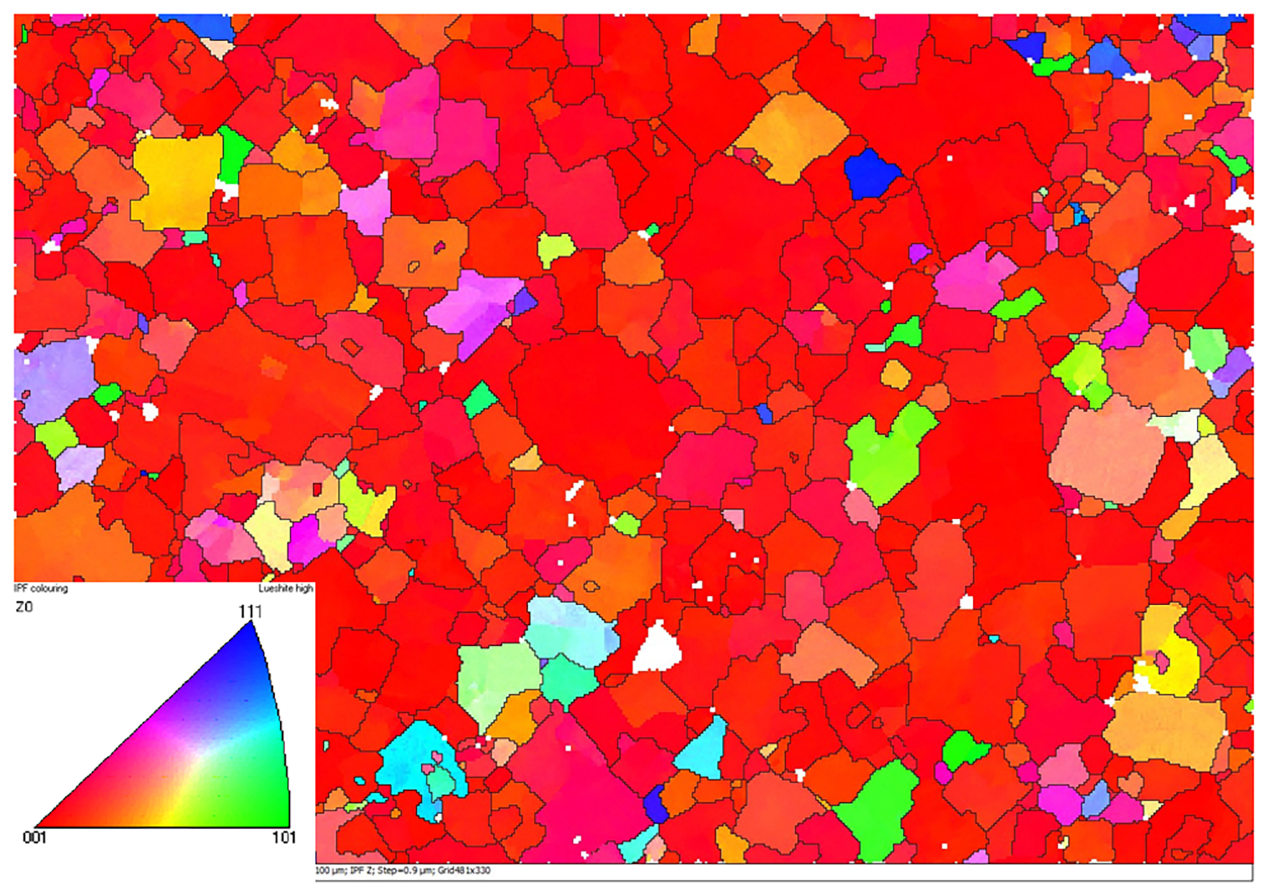


****Figure S4**** **EBSD inverse pole diagram testing along the direction perpendicular to the casting direction of 3T ceramics.**


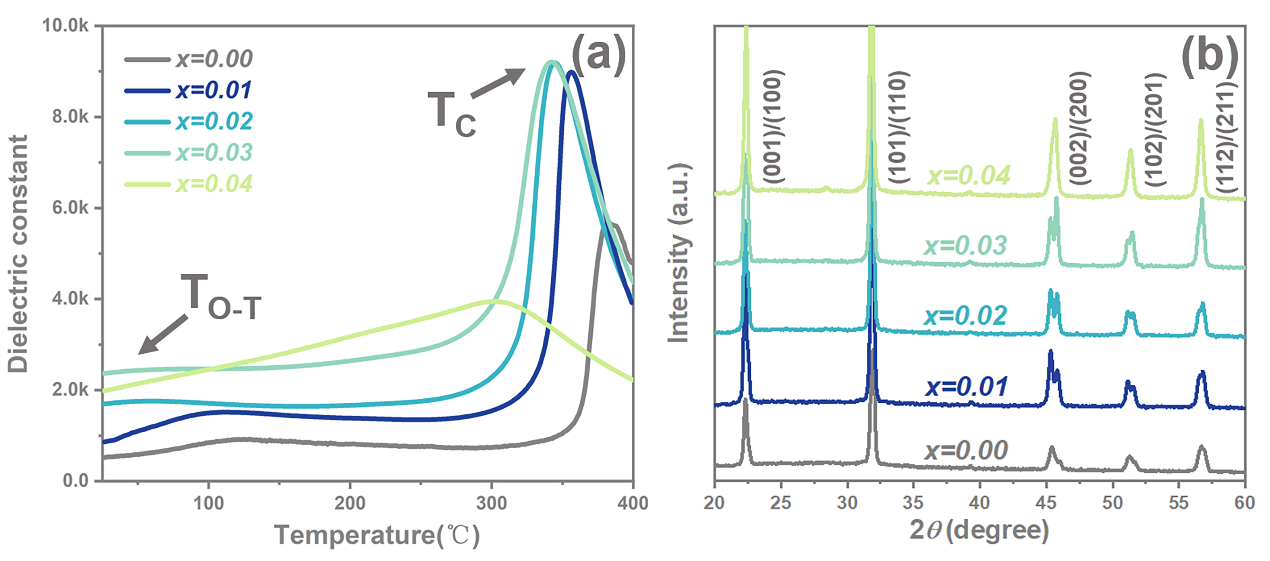


****Figure S5.** a) Temperature-dependent dielectric constant** (*ε*r-*T*) **curves at high temperature of** **the xR ceramics. b) The XRD patterns of the xR ceramics.**


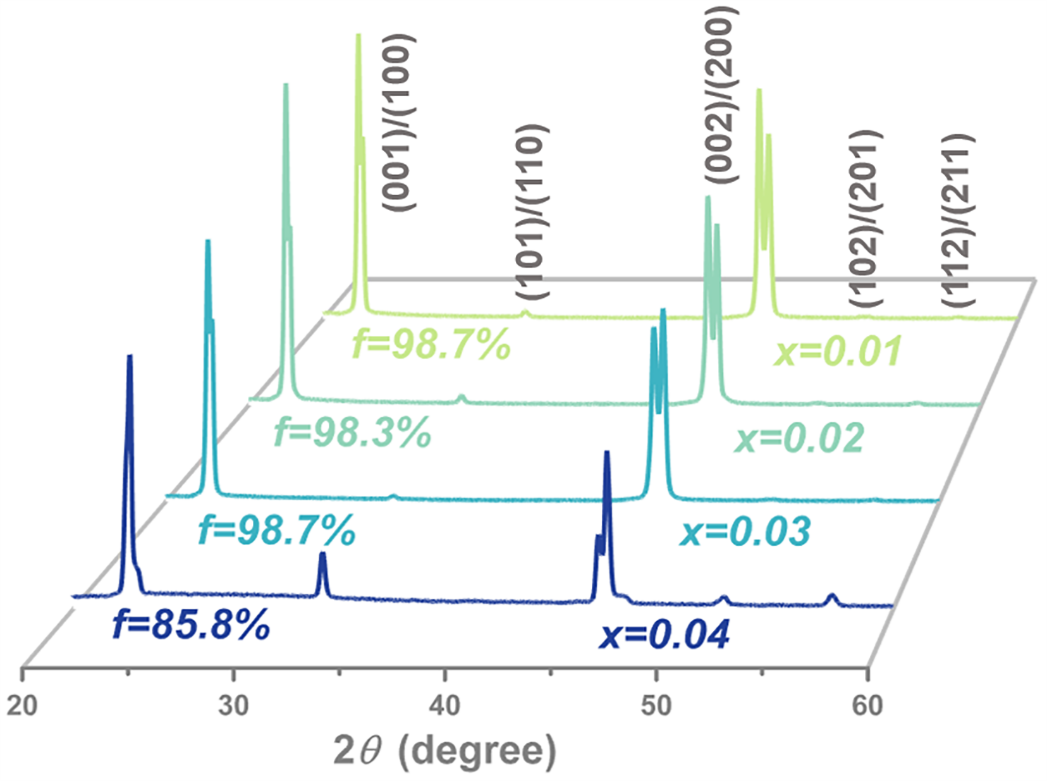


****Figure S6.** The XRD patterns of the xT ceramics.**


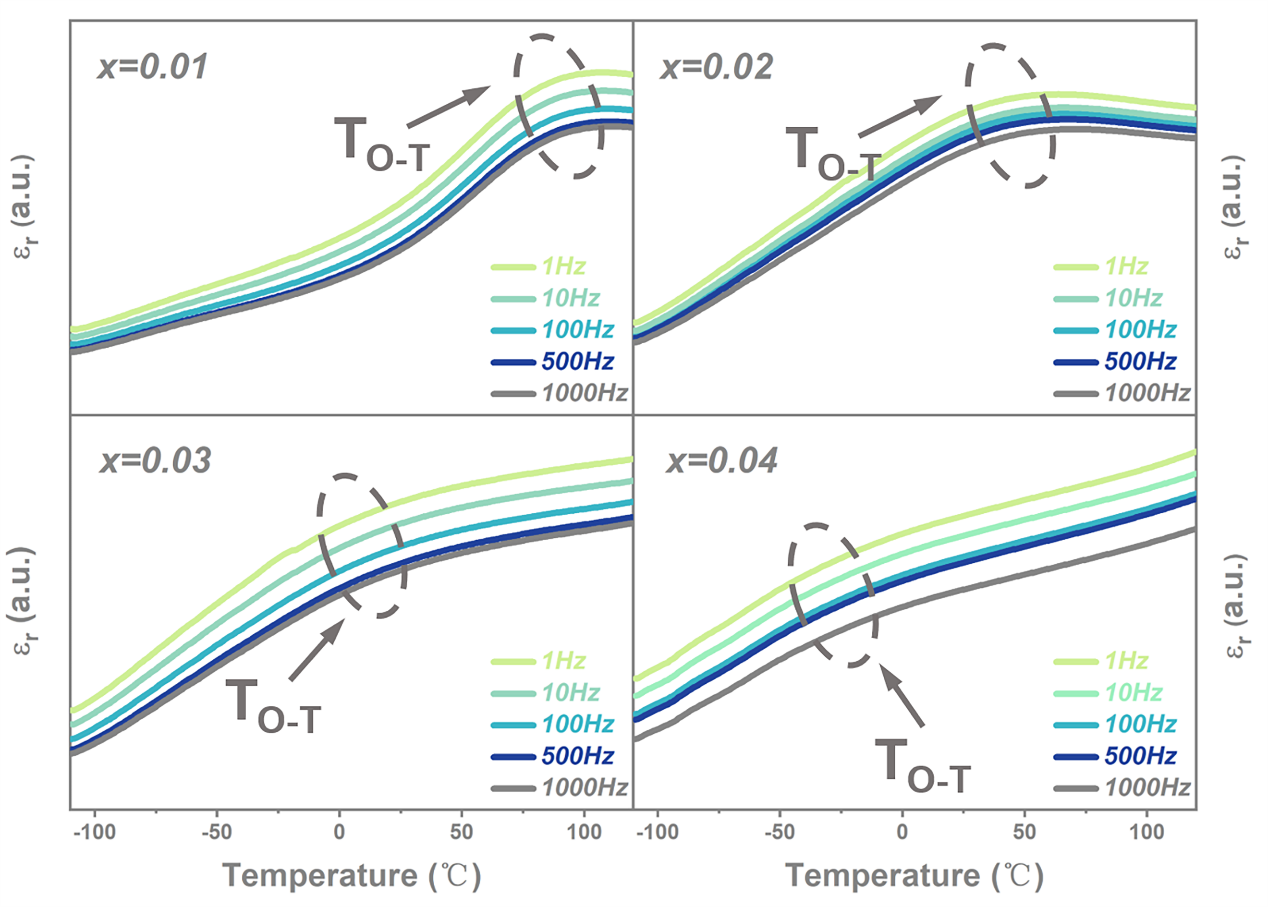


****Figure S7.**** Temperature-dependent dielectric constant (*ε*r-*T*) curves **at low temperature** **of the xT ceramics.**


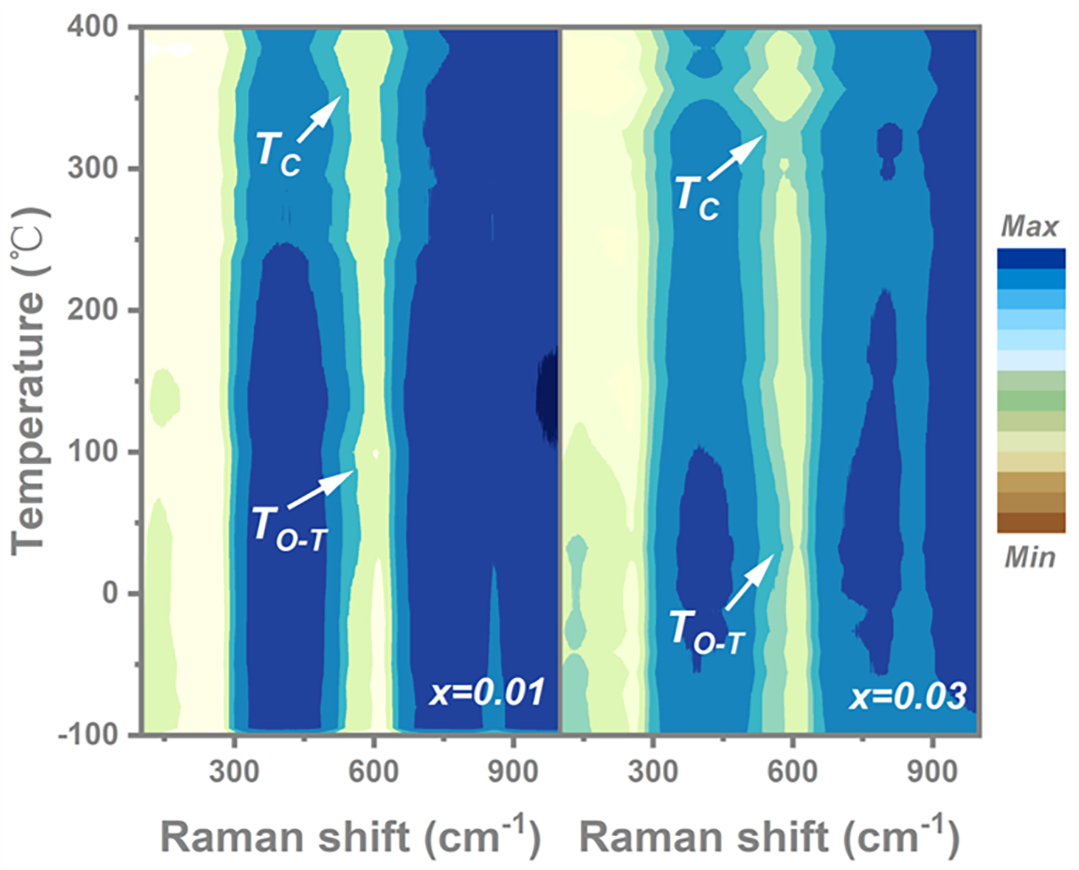


****Figure S8.**** *In-situ* variable temperature Raman spectrum of 1T and 3T ceramics.


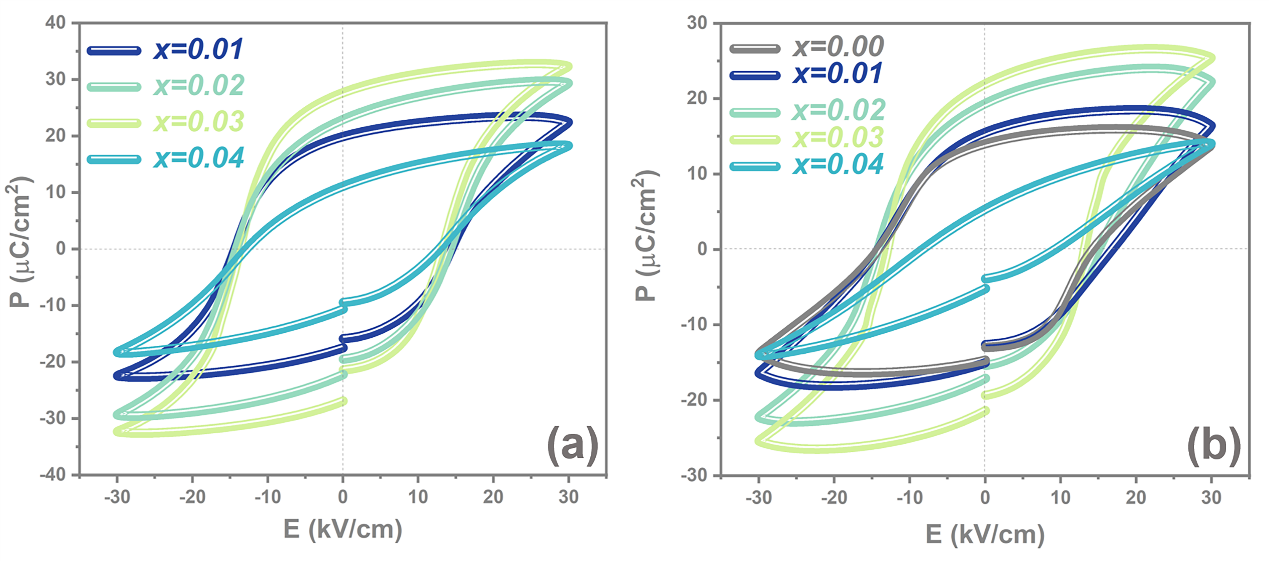


****Figure S9.**** a) ***P-E* hysteresis loops of the xT ceramics at room temperature.** b) *P-E* hysteresis loops of the xR ceramics at room temperature.


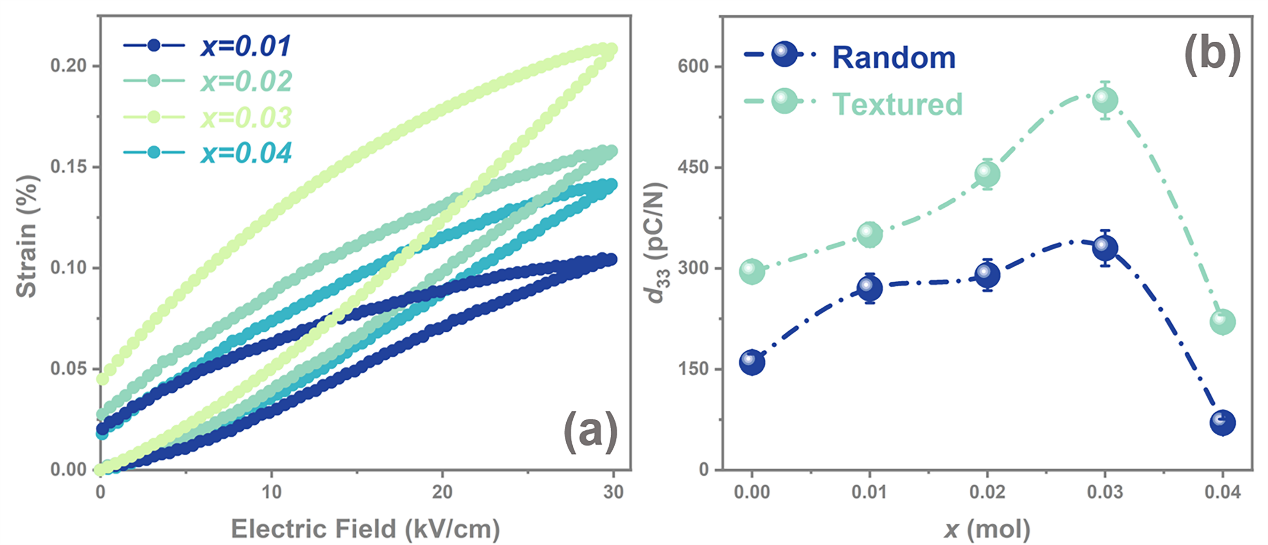


****Figure S10.** a) Unipolar S-E strain curves of the xT ceramics. b) *d*33 values of the random and textured ceramics.**


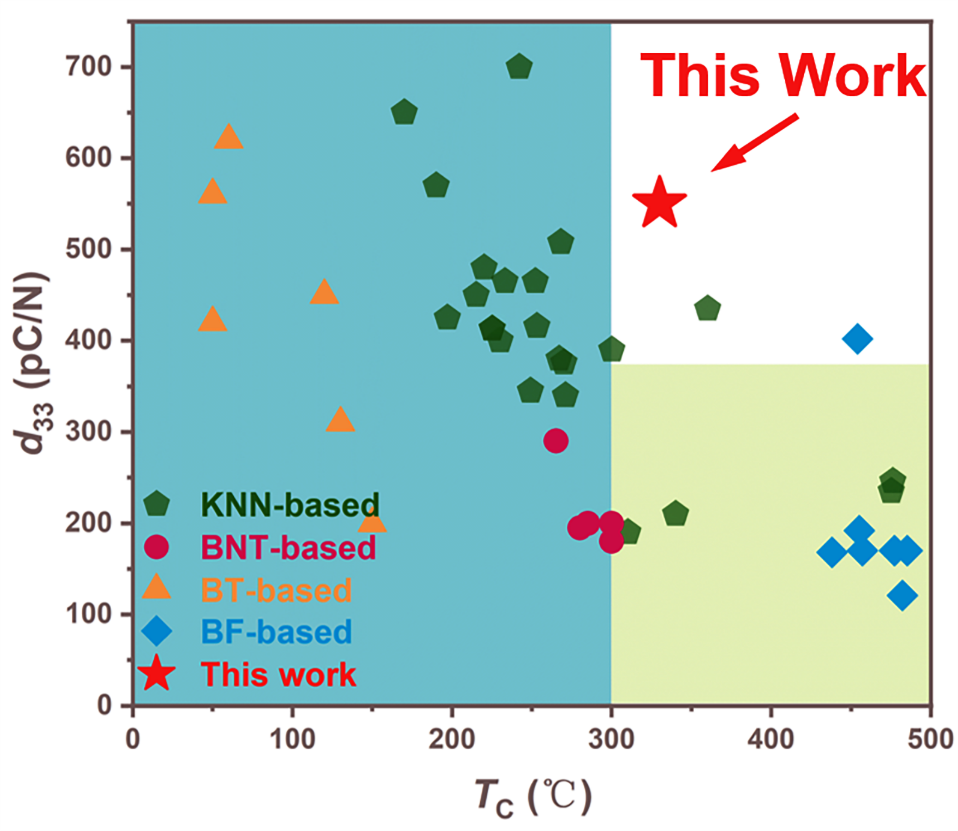


****Figure S11.**** The comprehensive performance comparison of the 3T ceramics with other Pb/Pb-free piezoceramics, including the *d*33 value and Curie temperature.


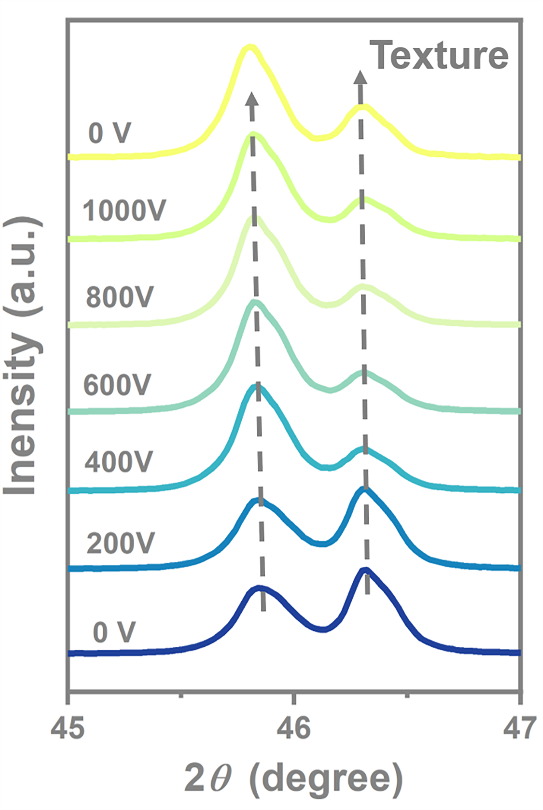


****Figure S12.**** f) In-situ variable electric fields XRD for the 3T ceramics.


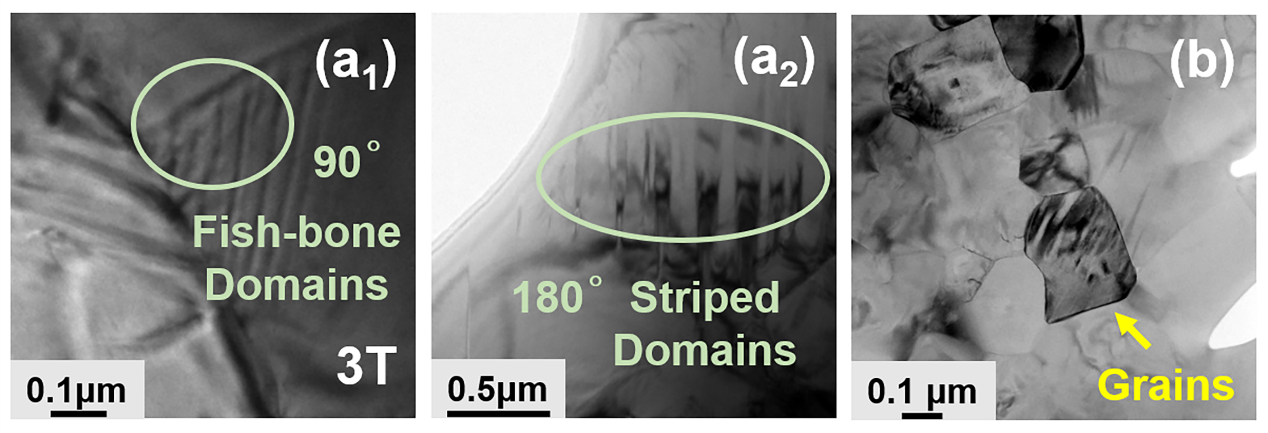


****Figure S13.**** a) TEM images for the 3T ceramics. b) TEM images for the 3R ceramics.


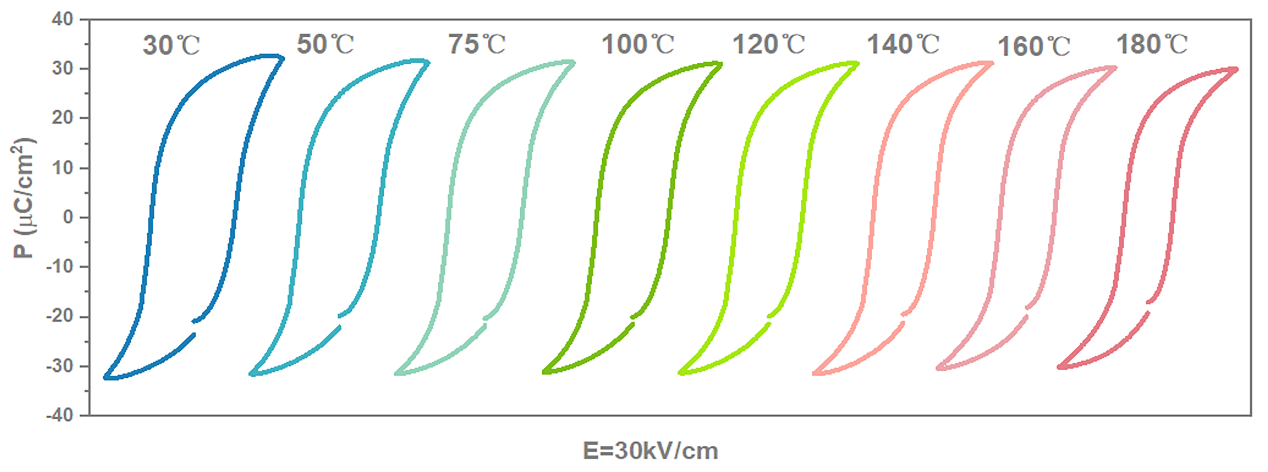


****Figure S14.**** *In-situ* variable temperature *P-E* loops for the 3T ceramics.


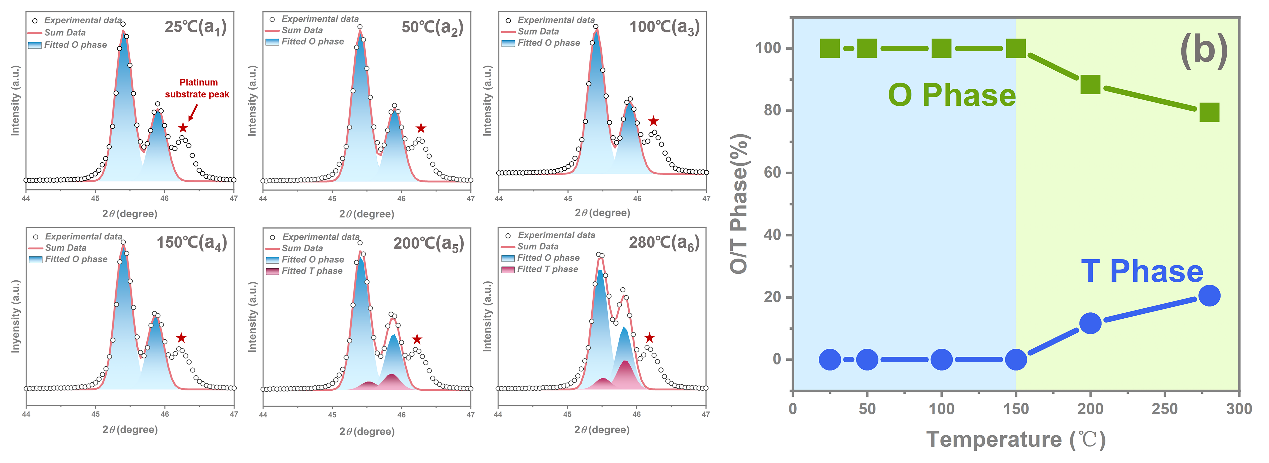


****Figure S15.** a) Peak fitting of the *in-situ* variable temperature XRD for the 3T ceramics after poled.** b) Peak fitting statistical chart.
